# Supplementary material
Source: PubMed Central journal article supplement (PMC3337012)
Supplement: 13311_2012_110_MOESM1_ESM.pdf [file 13311_2012_110_MOESM1_ESM.pdf]

To view the full contents of this document, you need a later version of the PDF viewer. You can upgrade to the latest version of Adobe Reader from [www.adobe.com/products/acrobat/readstep2.html](http://www.adobe.com/products/acrobat/readstep2.html)

For further support, go to [www.adobe.com/support/products/acrreader.html](http://www.adobe.com/support/products/acrreader.html)
